# Supplementary material
Source: Research Square preprint supplement (doi:10.21203/rs.3.rs-8673916/v1)

Supplementary Material 1

REDCap survey used for attending physician focus groups to establish information gathering benchmarks


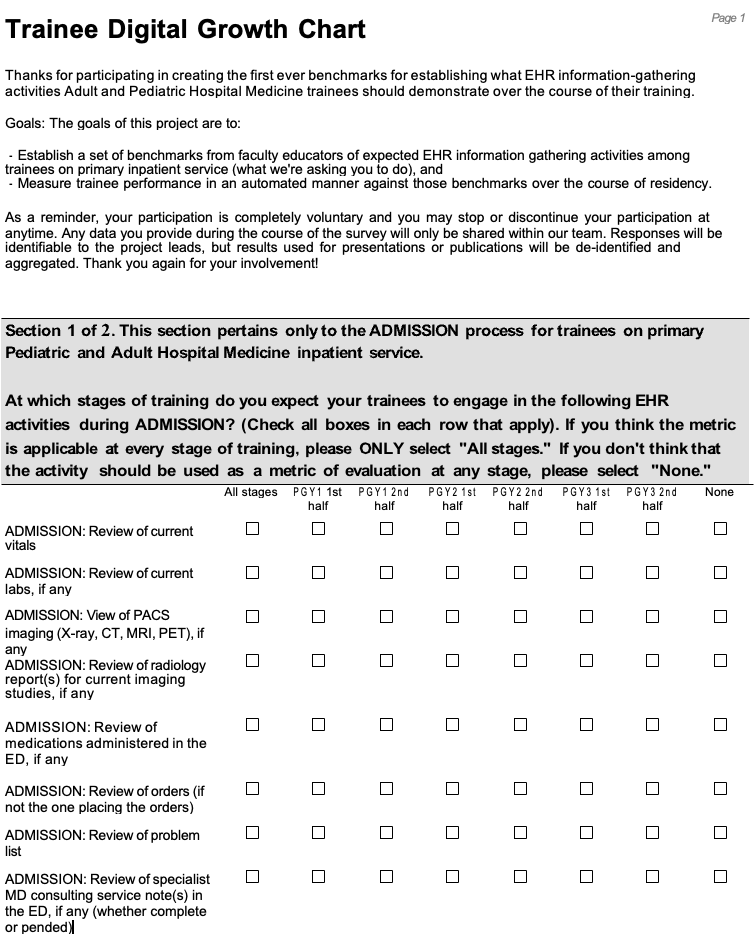


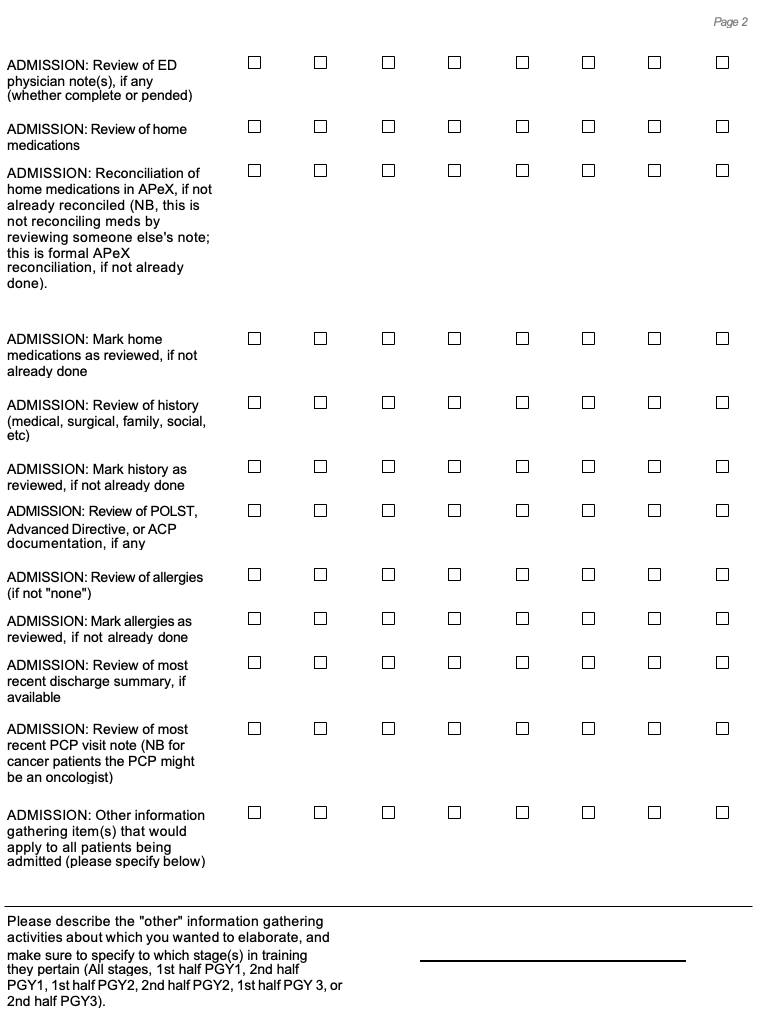


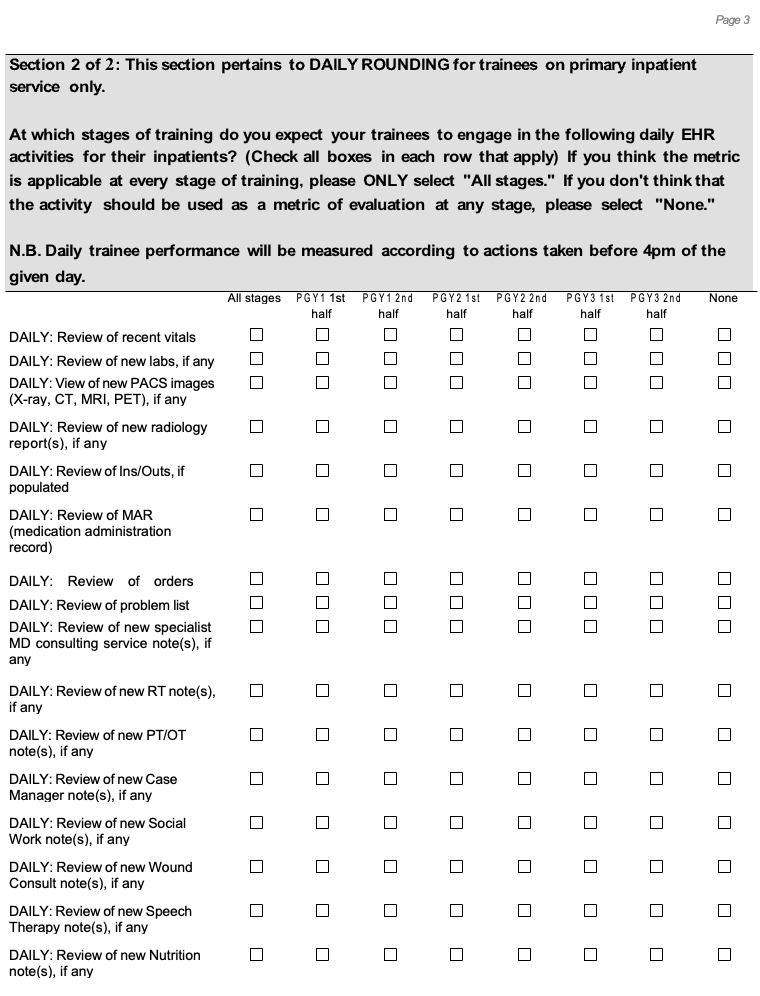


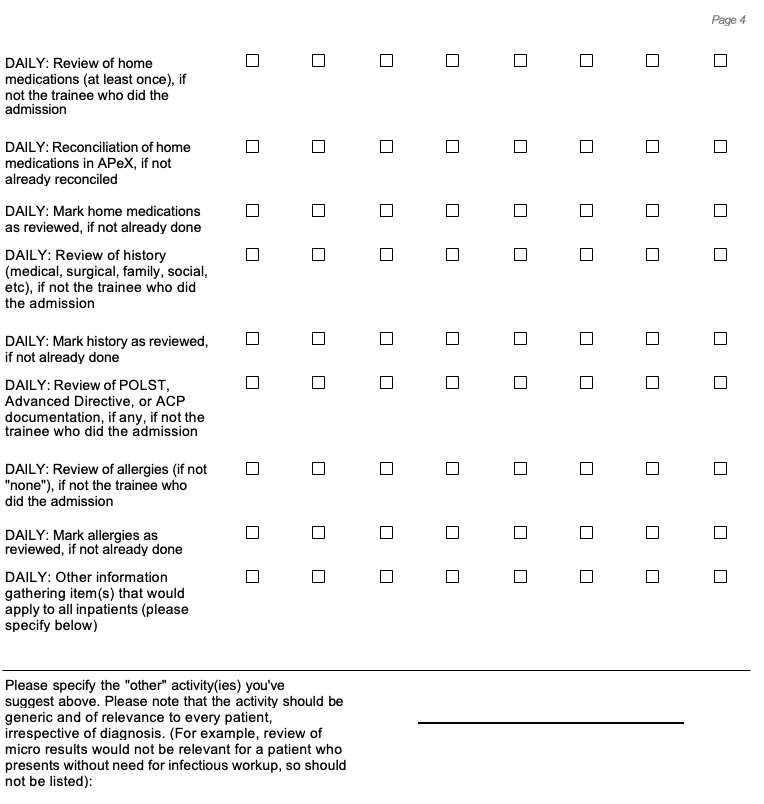

Supplement: Supplementary file 1 [file 7ffeacc611ddc2cf060fc2e6.docx]
