# Supplementary material
Source: Research Square preprint supplement (doi:10.21203/rs.3.rs-8673916/v1)
Supplement: Supplementary file 2 [file a19ef39f9a86bb22c2ac987d.docx]

Supplementary File 2, Model Parameter Estimates

Table 1: Model Parameter Estimates for A. Admitting and B. Rounding. Stderr = Standard error; CI = Confidence interval, ll = lower limit, ul = Upper limit.

# **Admitting**

| Comparison of immediate post-intervention changes (reference: Group D) | | | | | | |
| --- | --- | --- | --- | --- | --- | --- |
|  | b | Stderr | z | *P* value | ll | ul |
| A | -0.0327 | 0.1539 | -0.2122 | .83 | -0.3343 | 0.2690 |
| B | 0.0168 | 0.1056 | 0.1588 | .87 | -0.1903 | 0.2238 |
| C | -0.0031 | 0.2566 | -0.0121 | .99 | -0.5061 | 0.4999 |

| Comparison of post-intervention trajectories (ref: Group D) [scaled_performance / day] | | | | | | |
| --- | --- | --- | --- | --- | --- | --- |
|  | Coefficient | Stderr | z | *P* value | CI_ll | CI_ul |
| A | -0.0001 | 0.0012 | -0.0542 | .96 | -0.0024 | 0.0023 |
| B | -0.0012 | 0.0012 | -1.0330 | .30 | -0.0035 | 0.0011 |
| C | -0.0001 | 0.0015 | -0.0868 | .93 | -0.0031 | 0.0028 |

| Group-specific "immediate" changes | | | | | | |
| --- | --- | --- | --- | --- | --- | --- |
|  | Coefficient | Stderr | z | *P* value | CI_ll | CI_ul |
| A | -0.0023 | 0.1277 | -0.0181 | .99 | -0.2527 | 0.2481 |
| B | 0.0471 | 0.0616 | 0.7646 | .44 | -0.0737 | 0.1679 |
| C | 0.0272 | 0.2419 | 0.1126 | .91 | -0.4468 | 0.5013 |
| D | 0.0303 | 0.0858 | 0.3536 | .72 | -0.1378 | 0.1985 |

| Group-specific change in trajectories post-intervention [scaled_performance / day] | | | | | | |
| --- | --- | --- | --- | --- | --- | --- |
|  | Coefficient | Stderr | z | *P* value | CI_ll | CI_ul |
| A | -0.0003 | 0.0013 | -0.2007 | .84 | -0.0027 | 0.0022 |
| B | -0.0006 | 0.0009 | -0.7470 | .46 | -0.0024 | 0.0011 |
| C | 0.0009 | 0.0019 | 0.4857 | .63 | -0.0029 | 0.0047 |
| D | 0.0002 | 0.0009 | 0.2280 | .82 | -0.0015 | 0.0019 |

# **Rounding**

| Comparison of immediate post-intervention changes (reference: Group D) | | | | | | |
| --- | --- | --- | --- | --- | --- | --- |
|  | Coefficient | Stderr | z | *P* value | CI_ll | CI_ul |
| A | -0.0143 | 0.0602 | -0.2373 | .81 | -0.1323 | 0.1037 |
| B | -0.0644 | 0.0395 | -1.6295 | .10 | -0.1419 | 0.0131 |
| C | -0.1917 | 0.0990 | -1.9365 | .05 | -0.3857 | 0.0023 |

| Comparison of post-intervention trajectories (ref: Group D) [scaled_performance / day] | | | | | | |
| --- | --- | --- | --- | --- | --- | --- |
|  | Coefficient | Stderr | z | *P* value | CI_ll | CI_ul |
| A | 0.0002 | 0.0005 | 0.3845 | .70 | -0.0008 | 0.0012 |
| B | -0.0002 | 0.0005 | -0.2971 | .77 | -0.0012 | 0.0009 |
| C | 0.0010 | 0.0007 | 1.3028 | .19 | -0.0005 | 0.0024 |

| Group-specific "immediate" changes | | | | | | |
| --- | --- | --- | --- | --- | --- | --- |
|  | Coefficient | Stderr | z | *P* value | CI_ll | CI_ul |
| A | 0.0394 | 0.0526 | 0.7503 | .45 | -0.0636 | 0.1425 |
| B | -0.0107 | 0.0265 | -0.4027 | .69 | -0.0627 | 0.0413 |
| C | -0.1380 | 0.0946 | -1.4591 | .14 | -0.3233 | 0.0474 |
| D | 0.0537 | 0.0293 | 1.8336 | .07 | -0.0037 | 0.1112 |

| Group-specific change in trajectories post-intervention [scaled_performance / day] | | | | | | |
| --- | --- | --- | --- | --- | --- | --- |
|  | Coefficient | Stderr | z | *P* value | CI_ll | CI_ul |
| A | -0.0004 | 0.0005 | -0.7291 | .47 | -0.0014 | 0.0007 |
| B | -0.0005 | 0.0004 | -1.3158 | .19 | -0.0013 | 0.0003 |
| C | -0.0011 | 0.0010 | -1.0378 | .30 | -0.0030 | 0.0009 |
| D | -0.0002 | 0.0004 | -0.6414 | .52 | -0.0009 | 0.0005 |

Table 2. Model Parameter Estimates: Subgroup Analysis for PGY1 for A. Admitting, and B. Rounding

**A. Admitting**

| Comparison of immediate post-intervention changes (reference: Group D) | | | | | | |
| --- | --- | --- | --- | --- | --- | --- |
|  | b | se | z | *P* value | ll | ul |
| A | -0.2347 | 0.1447 | -1.6217 | .10 | -0.5183 | 0.0489 |
| B | -0.2353 | 0.1451 | -1.6213 | .10 | -0.5197 | 0.0491 |
| C | 0.1272 | 0.2926 | 0.4348 | .66 | -0.4462 | 0.7006 |

| Comparison of post-intervention trajectories (ref: Group D) [scaled_performance / day] | | | | | | |
| --- | --- | --- | --- | --- | --- | --- |
|  | Coefficient | Stderr | z | *P* value | CI_ll | CI_ul |
| A | 0.0019 | 0.0039 | 0.4778 | .63 | -0.0057 | 0.0095 |
| B | 0.0129 | 0.0164 | 0.7847 | .43 | -0.0193 | 0.0450 |
| C | -0.0049 | 0.0051 | -0.9593 | .34 | -0.0148 | 0.0051 |

| Group-specific "immediate" changes | | | | | | |
| --- | --- | --- | --- | --- | --- | --- |
|  | Coefficient | Stderr | z | *P* value | CI_ll | CI_ul |
| A | -0.0557 | 0.1076 | -0.5171 | .61 | -0.2666 | 0.1553 |
| B | -0.0562 | 0.1082 | -0.5199 | .60 | -0.2682 | 0.1558 |
| C | 0.3062 | 0.2816 | 1.0876 | .28 | -0.2456 | 0.8581 |
| D | 0.1790 | 0.0967 | 1.8509 | .06 | -0.0105 | 0.3686 |

| Group-specific change in trajectories post-intervention [scaled_performance / day] | | | | | | |
| --- | --- | --- | --- | --- | --- | --- |
|  | Coefficient | Stderr | z | *P* value | CI_ll | CI_ul |
| A | -0.0041 | 0.0024 | -1.6801 | .09 | -0.0089 | 0.0007 |
| B | 0.0076 | 0.0161 | 0.4735 | .64 | -0.0240 | 0.0392 |
| C* |  |  |  |  |  |  |
| D | -0.0048 | 0.0031 | -1.5592 | .12 | -0.0109 | 0.0012 |

*Not estimable due to collinearity

**B. Rounding**

| Comparison of immediate post-intervention changes (reference: Group D) | | | | | | |
| --- | --- | --- | --- | --- | --- | --- |
|  | Coefficient | Stderr | z | *P* value | CI_ll | CI_ul |
| A | -0.0581 | 0.0528 | -1.0995 | .27 | -0.1617 | 0.0455 |
| B | -0.0293 | 0.0437 | -0.6700 | .50 | -0.1151 | 0.0564 |
| C | -0.2680 | 0.1348 | -1.9885 | .047 | -0.5322 | -0.0038 |

| Comparison of post-intervention trajectories (ref: Group D) [scaled_performance / day] | | | | | | |
| --- | --- | --- | --- | --- | --- | --- |
|  | Coefficient | Stderr | z | *P* value | CI_ll | CI_ul |
| A | 0.0048 | 0.0014 | 3.4040 | <.001 | 0.0020 | 0.0075 |
| B | 0.0002 | 0.0038 | 0.0529 | .96 | -0.0073 | 0.0077 |
| C | 0.0186 | 0.0112 | 1.6643 | .10 | -0.0033 | 0.0405 |

| Group-specific "immediate" changes | | | | | | |
| --- | --- | --- | --- | --- | --- | --- |
|  | Coefficient | Stderr | z | *P* value | CI_ll | CI_ul |
| A | -0.0405 | 0.0452 | -0.8961 | .37 | -0.1290 | 0.0481 |
| B | -0.0117 | 0.0341 | -0.3431 | .73 | -0.0785 | 0.0551 |
| C | -0.2504 | 0.1320 | -1.8974 | .06 | -0.5091 | 0.0083 |
| D | 0.0176 | 0.0274 | 0.6427 | .52 | -0.0361 | 0.0713 |

| Group-specific change in trajectories post-intervention [scaled_performance / day] | | | | | | |
| --- | --- | --- | --- | --- | --- | --- |
|  | Coefficient | Stderr | z | *P* value | CI_ll | CI_ul |
| A | 0.0037 | 0.0010 | 3.8647 | <.001 | 0.0018 | 0.0056 |
| B | -0.0009 | 0.0037 | -0.2452 | .80 | -0.0081 | 0.0063 |
| C | 0.0168 | 0.0113 | 1.4872 | .13 | -0.0053 | 0.0389 |
| D | -0.0011 | 0.0011 | -1.0504 | .29 | -0.0032 | 0.0010 |
